# Supplementary material for: Phylogenomic tree of Cercozoa based on single-cell transcriptomes from 100 uncultured cells
Source: BMC Biol. 2026 Jan 30;24:55. doi: 10.1186/s12915-026-02536-4 (PMC12930898; doi:10.1186/s12915-026-02536-4)
Supplement: Supplementary file 5 — Additional file 5. Table S1. Sampling information for all cells [file 12915_2026_2536_MOESM5_ESM.xlsx]

## Sheet: Sheet1
ID	taxon	sampling location coarse	sampling location fine	lat/long	sampling environment	date collected	notes	NCBI SRA accession	SSU accession (NCBI GenBank)	video
AllasLQco (AllasQCH4, AllasQCH6)	Allas sp.	–	–	–	–	–	Phylofisher-collapsed taxon (AllasQCH4, AllasQCH6)	–	–
AllasLRB6	Allas sp.	Quadra Island, British Columbia, Canada	Quadra Len Road Beach Mud	50.121218, -125.235157	marine intertidal sediment	15-09-2021		SRR35302900	PX213621	LRB6_C0624.MP4
AllasQCH4	Allas sp.	Quadra Island, British Columbia, Canada	Quadra Cove House	50.150597, -125.264388	marine intertidal sediment	04-08-2020		SRR35302899, SRR35302846	PX213620	QCH4_C0031.MP4
AllasQCH6	Allas sp.	Quadra Island, British Columbia, Canada	Quadra Cove House	50.150597, -125.264388	marine intertidal sediment	07-08-2020		SRR35302818	PX213619	QCH6_C0033.MP4
AulacanDPH28	Aulographis c.f. stellata	Quadra Island, British Columbia, Canada	Quadra Deep (Zoo)plankton Tow Hakai, station QU39	50.030700, -125.099200	marine water column, plankton tow, 0-240m	21-10-2022	no video	SRR35302807	no SSU found	no video
AulacanDPH4	Aulographis sp.	Quadra Island, British Columbia, Canada	Quadra Deep (Zoo)plankton Tow Hakai, station QU39	50.030700, -125.099200	marine water column, plankton tow, 0-240m	18-10-2022		SRR35302875	no SSU found	DPH4_C0014.MP4, DPH4_HMC12_C0080.MP4
	Aulastrum sp.	–	–	–	–	–	Phylofisher-collapsed taxon (AuloDPH10, AuloDPH12)	–	–
AuloDPH1	Aulosphaerid sp.	Quadra Island, British Columbia, Canada	Quadra Deep (Zoo)plankton Tow Hakai, station QU39	50.030700, -125.099200	marine water column, plankton tow, 0-240m	18-10-2022		SRR35302863	PX213534	DPH1_HMC10_C0784.MP4
AuloDPH10	Aulastrum sp.	Quadra Island, British Columbia, Canada	Quadra Deep (Zoo)plankton Tow Hakai, station QU39	50.030700, -125.099200	marine water column, plankton tow, 0-240m	19-10-2022	no video	SRR35302794	PX213554	no video
AuloDPH12	Aulastrum sp.	Quadra Island, British Columbia, Canada	Quadra Deep (Zoo)plankton Tow Hakai, station QU39	50.030700, -125.099200	marine water column, plankton tow, 0-240m	19-10-2022	no video	SRR35302782	PX213555	no video
AuloDPH14	Aulosphaerid sp.	Quadra Island, British Columbia, Canada	Quadra Deep (Zoo)plankton Tow Hakai, station QU39	50.030700, -125.099200	marine water column, plankton tow, 0-240m	20-10-2022	no video	SRR35302831	PX213535	no video
AuloDPH25	Aulosphaerid sp.	Quadra Island, British Columbia, Canada	Quadra Deep (Zoo)plankton Tow Hakai, station QU39	50.030700, -125.099200	marine water column, plankton tow, 0-240m	21-10-2022	no video	SRR35302898	PX227519	no video
AuloLiz209	Castanarium sp.	Bering Strait	Alaska cruise 2023, site KOD10, 300-400m depth, Multinet	57.2045, -149.7195	marine water column, plankton tow, 300-400m	29-04-2023		SRR35302887	PX213537	Liz209_ALA209_4x.MP4
AuloLiz39	Castanarium sp.	Bering Strait	Alaska cruise 2023, site MID10, 400-600m depth, Multinet	58.91, -146	marine water column, plankton tow, 400-600m	23-04-2023		SRR35302856	PX213540	Liz39_ALA039_4x_10x.MP4
AuloLiz40	Castanarium sp.	Bering Strait	Alaska cruise 2023, site MID10, 400-600m depth, Multinet	58.91, -146	marine water column, plankton tow, 400-600m	23-04-2023		SRR35302853	PX213538	Liz40_ALA040_4x_10x.MP4
AuloLiz42	Castanarium sp.	Bering Strait	Alaska cruise 2023, site MID10, 400-600m depth, Multinet	58.91, -146	marine water column, plankton tow, 400-600m	23-04-2023		SRR35302852	PX213539	Liz42_ALA042_4x_10x.MP4
AuloscLiz303	Aulosphaerid sp.	Bering Strait	Alaska cruise 2023, site GAK15, 200-300m depth, Multinet	57.79166667, -147.5	marine water column, plankton tow, 200-300m	07-05-2023		SRR35302855	no SSU found	Liz303_C0576.MP4
AuloscLiz304	Aulosphaerid sp.	Bering Strait	Alaska cruise 2023, site GAK15, 200-300m depth, Multinet	57.79166667, -147.5	marine water column, plankton tow, 200-300m	07-05-2023		SRR35302851	PX213530	Liz304_vid1_C0577.MP4, Liz304_vid2_C0578.MP4
AuloscLiz305	Aulosphaerid sp.	Bering Strait	Alaska cruise 2023, site GAK15, 200-300m depth, Multinet	57.79166667, -147.5	marine water column, plankton tow, 200-300m	07-05-2023		SRR35302850	PX213531	Liz305_vid1_C0579.MP4, Liz305_vid2_C0580.MP4
AuloscLiz307	Aulosphaerid sp.	Bering Strait	Alaska cruise 2023, site GAK15, 0-200m depth, Multinet	57.79166667, -147.5	marine water column, plankton tow, 0-200m	07-05-2023		SRR35302849	PX213532	Liz307_vid1_C0586.MP4, Liz307_vid2_C0587.MP4
AurantQB5	Auranticordis sp.	Quadra Island, British Columbia, Canada	Quadra settlement brush (PIS-010)	50.103127, -125.211307	settlement brush, marine	18-04-2023		SRR35302848	PX213604	QB5_C0024.MP4
CercABS1	Cryothecomonad sp.	Quadra Island, British Columbia, Canada	Quadra Annex Beach Sediment	50.115276, -125.219791	marine intertidal sediment	16-09-2021		SRR35302845	no SSU found	ABS1.MP4
CercoCBS1	Marimonada sp.	CARMABI station, Curacao	CARMABI Beach Sand	12.122066, -68.970010	marine intertidal sediment	21-02-2023		SRR35302844	PX213606	CBS1.MP4
CercoCBS2	Filosa sp. (NC6)	CARMABI station, Curacao	CARMABI Beach Sand	12.122066, -68.970010	marine intertidal sediment	21-02-2023		SRR35302847	PX213580	CBS2.MP4
CercoLC32-240	Marimonada sp.	Bering Strait	Alaska cruise 2023, site GAK5, Hand Plankton Tow	59.26166667, -148.9083333	marine water column, hand plankton tow	03-05-2023		SRR35302843	PX213607	Liz32-240_basicflag240_63x.MP4
CercoLC32-83	Ventricleftid sp. (eVentri-clade)	Bering Strait	Alaska cruise 2023, site MID5, 10m depth, Niskin	59.65, -146.1	marine water column, Niskin, 10m, gravity-filtered	25-04-2023		SRR35302842	PX213594	LC32-83_bumpyflag83_63x.MP4
CercomSPO5	Cercomonas sp.	Galiano Island, British Columbia, Canada	Galiano Forest Litter	48.905138, -123.385753	forest soil litter	17-09-2020		SRR35302841	PX213628	SPO5_C0007.MP4
CercoSMB3	Filosa sp. (Novel Clade B)	Boka Sint Michiel, Curacao	Boka Sint Michiel Biofilm	12.148261, -68.998662	biofilm, marine	17-02-2023		SRR35302840	PX213618	SMB3_C0019.MP4
CercoTBM1	Cryothecomonad sp.	Quadra Island, British Columbia, Canada	Quadra Tula Beach Mud	50.11583, -125.221304	marine intertidal sediment	14-06-2023		SRR35302839	PX213578	TBM1_C0011.MP4
CercoTBM2	Ventricleftid sp. (Novel Clade A)	Quadra Island, British Columbia, Canada	Quadra Tula Beach Mud	50.11583, -125.221304	marine intertidal sediment	14-06-2023		SRR35302820	PX213595	TBM2_C0012.MP4
CercoTBM3	Ventricleftid sp. (Novel Clade A)	Quadra Island, British Columbia, Canada	Quadra Tula Beach Mud	50.11583, -125.221304	marine intertidal sediment	14-06-2023		SRR35302819	PX213596	TBM3_C0013.MP4
CercoTBM4	Ventricleftid sp. (Novel Clade A)	Quadra Island, British Columbia, Canada	Quadra Tula Beach Mud	50.11583, -125.221304	marine intertidal sediment	14-06-2023		SRR35302817	PX213597	TBM4_C0014.MP4
CercoTBS14	Filosa sp. (NC6)	Quadra Island, British Columbia, Canada	Quadra Tula Beach Sand	50.11583, -125.221304	marine intertidal sediment	21-10-2022		SRR35302816	PX213581	TBS14_C0023.MP4
CercoTBS20	Filosa sp. (NC6)	Quadra Island, British Columbia, Canada	Quadra Tula Beach Sand	50.11583, -125.221304	marine intertidal sediment	21-04-2023		SRR35302815	PX213583	TBS20_C0039.MP4
CercoTBS21	Filosa sp. (NC6)	Quadra Island, British Columbia, Canada	Quadra Tula Beach Sand	50.11583, -125.221304	marine intertidal sediment	21-04-2023		SRR35302814	PX213582	TBS21_C0040.MP4
CercoTBS22	Marimonada sp.	Quadra Island, British Columbia, Canada	Quadra Tula Beach Sand	50.11583, -125.221304	marine intertidal sediment	13-12-2023	no video, no images	SRR35302813	PX213610	no video, no images
CercoTS2	Filosa sp. (Novel Clade B)	Tugboat diving site, Curacao	Curacao Tugboat Sediment	12.067658, -68.863333	marine subtidal sediment, 28m depth	17-02-2023		SRR35302812	PX213616	TS2_C0011.MP4
CercoWF2	Skiomonad sp. (Novel Clade D)	Water Factory diving site, Curacao	Curacao Water Factory	12.108426, -68.953633	marine subtidal sediment	05-05-2022		SRR35302811	PX213629	WF2_C0019.MP4
CercoWF3	Skiomonad sp. (Novel Clade D)	Water Factory diving site, Curacao	Curacao Water Factory	12.108426, -68.953633	marine subtidal sediment	05-05-2022		SRR35302810	PX213630	WF3_C0020.MP4
CercoWF4	Skiomonad sp. (Novel Clade D)	Water Factory diving site, Curacao	Curacao Water Factory	12.108426, -68.953633	marine subtidal sediment	05-05-2022		SRR35302809	PX213631	WF4_C0021.MP4
CercoWFco (WF3, WF4, WF5)	Skiomonad sp. (Novel Clade D)	–	–	–	–	–	Phylofisher-collapsed taxon (CercoWF2, CercoWF3, CercoWF4)	–	–
CercQB4	Thecofilosa sp.	Quadra Island, British Columbia, Canada	Quadra settlement brush (PIS-010)	50.103127, -125.211307	settlement brush, marine	18-04-2023		SRR35302808	PX213599	QB4_C0022.MP4
CercQCH1	Ventricleftid sp. (Novel Clade A)	Quadra Island, British Columbia, Canada	Quadra Cove House	50.150597, -125.264388	marine intertidal sediment	04-08-2020		SRR35302806	PX227520	QCH1_C0026.MP4
CercQCH3	Ventricleftid sp. (Novel Clade A)	Quadra Island, British Columbia, Canada	Quadra Cove House	50.150597, -125.264388	marine intertidal sediment	04-08-2020		SRR35302805, SRR35302804	PX213598	QCH3_C0030.MP4
CercTBS11	Ventrifissura sp.	Quadra Island, British Columbia, Canada	Quadra Tula Beach Sand	50.11583, -125.221304	marine intertidal sediment	16-09-2021		SRR35302803	no SSU found	TBS11_C0622.MP4
ChalleDPH6	Protocystis sp.	Quadra Island, British Columbia, Canada	Quadra Deep (Zoo)plankton Tow Hakai, station QU39	50.030700, -125.099200	marine water column, plankton tow, 0-240m	18-10-2022		SRR35302802	no SSU found	DPH6_C0016.MP4
CoeloLiz306-1	Aulokleptes sp.	Bering Strait	Alaska cruise 2023, site GAK15, 400-600m depth, Multinet	57.79166667, -147.5	marine water column, plankton tow, 300-400m	07-05-2023		SRR35302800	PX213557	Liz306-1_C0581.MP4, Liz306-1_C0582.MP4
CoeloLiz306-2	Aulokleptes sp.	Bering Strait	Alaska cruise 2023, site GAK15, 400-600m depth, Multinet	57.79166667, -147.5	marine water column, plankton tow, 400-600m	07-05-2023		SRR35302879	PX213558	Liz306-2_vid1_C0583.MP4, Liz306-2_vid2_C0585.MP4
CryoHMC11	Cryothecomonas aestivalis	Quadra Island, British Columbia, Canada	Station QU38 (Quadra shellfish raft), zooplankton tow	50.117200, -125.223000	marine water column, hand plankton tow	24-08-2020	no video	SRR35302878	PX213559	no video
CryoLC27flake6	Cryothecomonas longipes	Quadra Island, British Columbia, Canada	Quadra Annex Plankton Tow	50.115276, -125.219791	marine water column, hand plankton tow	26-07-2022		SRR31106254	PX213567	LC27_flake6_26jul2022.MP4
CryoNO2022	Filosa sp. (Novel Clade B)	Quadra Island, British Columbia, Canada	Quadra Island, Strait of Georgia, Sutil Channel, station QU39, 260m depth, Niskin	50.030700, -125.099200	water column, gravity-filtered	23-08-2022		SRR35302877	PX213617	NO2022_20220823-8_HMC10_C0758.MP4, NO2022_20220823-8_HMC10_C0759.MP4
CryoQCF12	Filosa sp. (Novel Clade)	Quadra Island, British Columbia, Canada	Quadra Quathiaski Cove Ferry Mud	50.041338, -125.215309	marine intertidal sediment	15-09-2021		SRR35302876	no SSU found	QCF12_C0597.MP4
CryoSRP1	Cryothecomonas longipes	Quadra Island, British Columbia, Canada	Quadra Shellfish Raft Station Plankton Tow	50.117108, -125.222653	marine water column, hand plankton tow	13-09-2021		SRR31106255	PX213564	SRP1_C0575.MP4
CryoSRP2	Cryothecomonas longipes	Quadra Island, British Columbia, Canada	Quadra Shellfish Raft Station Plankton Tow	50.117108, -125.222653	marine water column, hand plankton tow	13-09-2021		SRR35302874	PX213565	SRP2_C0576.MP4
CryoTBS8	Marimonada sp.	Quadra Island, British Columbia, Canada	Quadra Tula Beach Sand	50.11583, -125.221304	marine intertidal sediment	15-09-2021		SRR35302873	PX213609	TBS8_C0606.MP4
Cryotheco1-co (CryoHMC11, LC28ditswarm12, LC28ditblobs10)	Cryothecomonas aestivalis	–	–	–	–	–	Phylofisher-collapsed taxon (CryoHMC11, LC28ditswarm12, LC28ditblobs10)	–	–
Cryotheco2-co (CryoLC27flake6, CryoSRP1, CryoSRP2)	Cryothecomonas longipes	–	–	–	–	–	Phylofisher-collapsed taxon (CryoLC27flake6, CryoSRP1, CryoSRP2)	–	–
DiscoTBS24	Discomonas sp.	Quadra Island, British Columbia, Canada	Quadra Tula Beach Sand	50.11583, -125.221304	marine intertidal sediment	13-12-2023	no video, no images	SRR35302872	PX213627	no video, no images
EbriaHDP7	Ebria tripartita	Quadra Island, British Columbia, Canada	Quadra HBI Dock Plankton Tow	50.103136, -125.211907	marine water column, hand plankton tow	06-08-2021		SRR35302871	PX213588	HDP7_C0028.MP4
EbriaLC27P7	Ebria tripartita	Quadra Island, British Columbia, Canada	Quadra Annex Plankton Tow	50.115276, -125.219791	marine water column, hand plankton tow	26-07-2022		SRR35302870	PX213589	LC27P7_LC27_ebridparty7_26jul2022.MP4
EbriaLCE2	Cryothecomonas longipes	Vanier Park, Vancouver, British Columbia, Canada	Vanier Park	49.277114, -123.139743	marine water column, hand plankton tow	27-09-2020		SRR35302869	PX213566	LC06ebrid2_27sep2020.mp4
EbriaQAP-HDPco (EbriaQAP11, EbriaQAP17, EbriaQAP18)	Ebria tripartita	–	–	–	–	–	Phylofisher-collapsed taxon (EbriaQAP11, EbriaQAP17, EbriaQAP18)	–	–
EbriaQAP9	Ebria tripartita	Quadra Island, British Columbia, Canada	Quadra Annex Plankton Tow	50.115276, -125.219791	marine water column, hand plankton tow	26-07-2022		SRR35302868	PX213587	QAP9_C0001.MP4, QAP9_C0002.MP4
EbriaQAP11	Ebria tripartita	Quadra Island, British Columbia, Canada	Quadra Annex Plankton Tow	50.115276, -125.219791	marine water column, hand plankton tow	26-07-2022		SRR35302867	PX213586	QAP11_C0004.MP4, QAP11_C0005.MP4
EbriaQAP17	Ebria tripartita	Quadra Island, British Columbia, Canada	Quadra Annex Plankton Tow	50.115276, -125.219791	marine water column, hand plankton tow	26-07-2022	no video	SRR35302866	PX213585	no video
EbriaQAP18	Ebria tripartita	Quadra Island, British Columbia, Canada	Quadra Annex Plankton Tow	50.115276, -125.219791	marine water column, hand plankton tow	26-07-2022	no video	SRR35302864	PX213584	no video
FiloLC-co (FiloLC32-4, FiloLC32-5, FiloLC32-77, LC35avo1044, LC34avo877)	Cryothecomonad sp.	–	–	–	–	–	Phylofisher-collapsed taxon (FiloLC32-4, FiloLC32-5, FiloLC32-77, LC35avo1044, LC34avo877)	–	–
FiloLC32-4	Cryothecomonad sp.	Seward, Alaska, USA	Seward, Alaska, Hand Plankton Tow	60.098432, -149.442677	marine water column, hand plankton tow	21-04-2023		SRR35302862	PX213569	LC32-4_ballflag4_63x.MP4
FiloLC32-5	Cryothecomonad sp.	Seward, Alaska, USA	Seward, Alaska, Hand Plankton Tow	60.098432, -149.442677	marine water column, hand plankton tow	21-04-2023		SRR35302865	PX213570	LC32-5_ballflag5_63x.MP4
FiloLC32-77	Cryothecomonad sp.	Bering Strait	Alaska cruise 2023, site MID5, 10m depth, Niskin	59.65, -146.1	marine water column, Niskin, 10m, gravity-filtered	25-04-2023		SRR35302861	PX213573	LC32-77_roundflag77_63x.MP4
FiloLC33-100	Cryothecomonad sp.	Bering Strait	Alaska cruise 2023, site IB0, Hand Plankton Tow	60.27166667, -148.3616667	marine water column, hand plankton tow	26-04-2023		SRR35302860	PX213574	LC33-100_63x.MP4
FiloLC33-101	Cryothecomonad sp.	Bering Strait	Alaska cruise 2023, site IB0, Hand Plankton Tow	60.27166667, -148.3616667	marine water column, hand plankton tow	26-04-2023		SRR35302801	PX213575	LC33-101_63x.MP4
FiloLC33-103	Cryothecomonad sp.	Bering Strait	Alaska cruise 2023, site IB0, Hand Plankton Tow	60.27166667, -148.3616667	marine water column, hand plankton tow	26-04-2023		SRR35302799	PX213576	LC33-103_63x.MP4
FiloLC33-99	Cryothecomonad sp.	Bering Strait	Alaska cruise 2023, site IB0, Hand Plankton Tow	60.27166667, -148.3616667	marine water column, hand plankton tow	26-04-2023		SRR35302798	PX213577	LC33-99_63x.MP4
FilosaNC4-co (VentBB13, VentBB15, VentTBM7)	Filosa sp. (Novel Clade C)	–	–	–	–	–	Phylofisher-collapsed taxon (VentBB13, VentBB15, VentTBM7)	–	–
FilosaNC6-co (CercoTBS14, CercoTBS20, CercoTBS21)	Filosa sp. (NC6)	–	–	–	–	–	Phylofisher-collapsed taxon (CercoTBS14, CercoTBS20, CercoTBS21)	–	–
Hedrpel	Hedriocystis pellucida strain UP2314 (cell SC1203)	University of British Columbia, Vancouver, British Columbia, Canada	freshwater canal in front of Beaty Research Centre	49.26377125285513, -123.25050181771321	freshwater sediment	09-05-2023		SRR35302797	PX213634	Hedrpel_VT_693_ZeissAxiovert_UP2314_culture_overview_in_dish.MP4, Hedrpel_VT_694_ZeissAxiovert_UP2314_PCclosup_on_slide.MP4, Hedrpel_VT_695_ZeissAxioplan_UP2314_DICclosup_on_slide.MP4
LC26E1	Ebria sp. LC26-ebrid1	Vanier Park, Vancouver, British Columbia, Canada	Vanier Park	49.277114, -123.139743	marine water column, hand plankton tow	19-05-2021		SRR35302796	no SSU found	LC26ebrid1.MP4
LC28ditblobs10	Cryothecomonas aestivalis	Vanier Park, Vancouver, British Columbia, Canada	Vanier Park	49.277114, -123.139743	marine water column, hand plankton tow	14-09-2022		SRR35302795	PX213561	LC28_ditblobs10_14sep2022.MP4
LC28ditswarm12	Cryothecomonas aestivalis	Vanier Park, Vancouver, British Columbia, Canada	Vanier Park	49.277114, -123.139743	marine water column, hand plankton tow	14-09-2022		SRR35302793	PX213562	LC28_ditswarm12_14sep2022.MP4
LC35avo1044	Cryothecomonad sp.	Bering Strait	Alaska cruise 2024, site GAK1, 0-100 depth, calvet	59.845, -149.4666667	marine water column, plankton tow, 0-100m	04-05-2024		SRR35302792	PX213571	LC35avo1044.MP4
LC35avo877	Cryothecomonad sp.	Bering Strait	Alaska cruise 2024, site PWS3, 250m depth, Niskin	60.66666667, -147.6666667	marine water column, Niskin, 250m, gravity-filtered	01-05-2024		SRR35302791	PX213572	LC35avo877.MP4
LC35flag517	Ebria sp.	Bering Strait	Alaska cruise 2024, site MID7i, Hand Plankton Tow	59.30445, -146.25	marine water column, hand plankton tow	28-04-2024		SRR35302790	PX213590	LC35flag517.MP4
LC35flag928	Cryothecomonas sp.	Bering Strait	Alaska cruise 2024, site IB0, Hand Plankton Tow	60.27166667, -148.3616667	marine water column, hand plankton tow	02-05-2024		SRR35302789	PX213562	LC35flag928.MP4
LC35paras1022	Cryothecomonas sp.	Bering Strait	Alaska cruise 2024, site GAK1, 0-100 depth, calvet	59.845, -149.4666667	marine water column, plankton tow, 0-100m	04-05-2024		SRR35302788	PX213563	LC35paras1022.MP4
LC35stumpy960	Cryothecomonad sp.	Bering Strait	Alaska cruise 2024, site IB0, Hand Plankton Tow	60.27166667, -148.3616667	marine water column, hand plankton tow	02-05-2024		SRR35302787	PX213568	LC35stumpy960.MP4
LirellaLiz294	Lirella bullata	Bering Strait	Alaska cruise 2023, site GAK12, 1000m depth, Niskin	58.24333333, -147.9333333	marine water column, Niskin, 1000m, gravity-filtered	06-05-2023		SRR35302786	PX213556	Liz294_C0567.MP4
Liz282	Protocystis sp.	Bering Strait	Alaska cruise 2023, site GAK12, 0m depth, Calvet	58.24333333, -147.9333333	marine water column, plankton tow, 0m	06-05-2023		SRR35302785	PX213529	Liz282_C0550.MP4
Liz302	Aulosphaerid sp.	Bering Strait	Alaska cruise 2023, site GAK15, 600-1200m depth, multinet	57.79166667, -147.5	marine water column, plankton tow, 600-1200m	07-05-2023		SRR35302784	PX213536	Liz302_C0575_10x.MP4
MariSB456C (MariSB4C, MariSB5C, MariSB6C)	Marimonada sp.	–	–	–	–	–	Phylofisher-collapsed taxon (MariSB4C, MariSB5C, MariSB6C)	–	–
MariSB4C	Marimonada sp.	Centennial Beach, Boundary Bay, Vancouver,British Columbia, Canada	Centennial Beach Sand	49.010033, -123.036444	marine intertidal sediment	23-12-2020	no video, no images	SRR35302781	PX213611	no video, no images
MariSB5C	Marimonada sp.	Centennial Beach, Boundary Bay, Vancouver,British Columbia, Canada	Centennial Beach Sand	49.010033, -123.036444	marine intertidal sediment	23-12-2020	no video, no images	SRR35302780	PX213612	no video, no images
MariSB6C	Marimonada sp.	Centennial Beach, Boundary Bay, Vancouver,British Columbia, Canada	Centennial Beach Sand	49.010033, -123.036444	marine intertidal sediment	23-12-2020	no video, no images	SRR35302783	PX213613	no video, no images
PhaeoDPH31	Protocystis acornis	Quadra Island, British Columbia, Canada	Quadra Deep (Zoo)plankton Tow Hakai, station QU39	50.030700, -125.099200	marine water column, plankton tow, 0-125m	13-06-2023		SRR35302838	PX227518	DPH31_C0009.MP4
ProtaPRC1	Protaspa sp.	Powell River, British Columbia, Canada	Powell River Sand	49.844908, -124.533263	marine intertidal sediment	27-08-2020		SRR35302837	PX227522	PRC1_C0053.MP4
ProtocyDPH19	Protocystis acornis	Quadra Island, British Columbia, Canada	Quadra Deep (Zoo)plankton Tow Hakai, station QU39	50.030700, -125.099200	marine water column, plankton tow, 0-240m	20-10-2022		SRR35302836	PX213541	DPH19_C0021.MP4
ProtocyDPH23	Protocystis c.f. acornis	Quadra Island, British Columbia, Canada	Quadra Deep (Zoo)plankton Tow Hakai, station QU39	50.030700, -125.099200	marine water column, plankton tow, 0-240m	20-10-2022	no video	SRR35302835	PX213548	no video
ProtocysDPH32	Protocystis acornis	Quadra Island, British Columbia, Canada	Quadra Deep (Zoo)plankton Tow Hakai, station QU39	50.030700, -125.099200	marine water column, plankton tow, 0-230m	15-06-2023		SRR35302834	PX213544	DPH32_C0018.MP4
ProtocysDPH33	Protocystis acornis	Quadra Island, British Columbia, Canada	Quadra Deep (Zoo)plankton Tow Hakai, station QU39	50.030700, -125.099200	marine water column, plankton tow, 0-230m	15-06-2023		SRR35302833	PX213543	DPH33_C0021.MP4
ProtocysDPH34	Protocystis acornis	Quadra Island, British Columbia, Canada	Quadra Deep (Zoo)plankton Tow Hakai, station QU39	50.030700, -125.099200	marine water column, plankton tow, 0-230m	15-06-2023		SRR35302832	PX213545	DPH34_C0023.MP4
ProtocysLC32-28	Protocystis sp.	Bering Strait	Alaska cruise 2023, site MID10, 600-1200, Multinet	58.91, -146	marine water column, plankton tow, 600-1200m	23-04-2023		SRR35302830	PX213550	LC32-28_C0249.MP4
ProtocysLiz123	Protocystis triangularis	Bering Strait	Alaska cruise 2023, site PWS2, 400-600m depth, Multinet	60.535, -147.8033333	marine water column, plankton tow, 400-600m	27-04-2023		SRR35302829	PX213553	Liz123_C0379.MP4
ProtocysLiz134	Protocystis c.f. acornis	Bering Strait	Alaska cruise 2023, site KOD10, 0-100m depth, Calvet	57.2045, -149.7195	marine water column, plankton tow, 0-100m	29-04-2023		SRR35302828	PX213549	Liz134_C0390.MP4
ProtocysLiz140	Protocystis acornis	Bering Strait	Alaska cruise 2023, site KOD10, 0-100m depth, Calvet	57.2045, -149.7195	marine water column, plankton tow, 0-100m	29-04-2023		SRR35302827	PX213547	Liz140_C0396.MP4
ProtocysLiz29	Protocystis sp.	Bering Strait	Alaska cruise 2023, site MID10, 600-1200, Multinet	58.91, -146	marine water column, plankton tow, 600-1200m	23-04-2023		SRR35302826	PX213551	Liz29_C0251.MP4
ProtocysLiz31	Protocystis sp.	Bering Strait	Alaska cruise 2023, site MID10, 600-1200, Multinet	58.91, -146	marine water column, plankton tow, 600-1200m	23-04-2023		SRR35302825	PX213552	Liz31_C0253.MP4
ProtocysLiz52	Protocystis acornis	Bering Strait	Alaska cruise 2023, site MID10, 100m depth, Niskin	58.91, -146	marine water column, Niskin, 100m, gravity-filtered	23-04-2023		SRR35302824	PX213546	Liz52_C0281.MP4
Protocystis1-co (ProtocysLC32-28, ProtocysLiz29, ProtocysLiz31)	Protocystis sp.	–	–	–	–	–	Phylofisher-collapsed taxon (ProtocysLC32-28, ProtocysLiz29, ProtocysLiz31)	–	–
Protocystis2-co (ProtocyDPH19, PhaeoDPH31, ProtocysDPH33)	Protocystis acornis	–	–	–	–	–	Phylofisher-collapsed taxon (ProtocyDPH19, PhaeoDPH31, ProtocysDPH33)	–	–
Protocystis3-co (ProtocysDPH32, ProtocysDPH34, ProtocysLiz52, ProtocysLiz140)	Protocystis acornis	–	–	–	–	–	Phylofisher-collapsed taxon (ProtocysDPH32, ProtocysDPH34, ProtocysLiz52, ProtocysLiz140)	–	–
ProtSMB2	Rhizaria sp.	Boka Sint Michiel, Curacao	Boka Sint Michiel Biofilm	12.148261, -68.998662	biofilm, marine	17-02-2023		SRR35302823	PX227521	SMB2_C0013.MP4
ProtTBS5	Protaspa sp.	Quadra Island, British Columbia, Canada	Quadra Tula Beach Sand	50.11583, -125.221304	marine intertidal sediment	14-09-2021		SRR35302822	PX213579	TBS5_C0594.MP4
PseuPirCHHak1	Marimonada sp.	Quadra Island, British Columbia, Canada	Heriot Bay Inn Dock	50.103135, -125.211812	marine water column, hand plankton tow	04-11-2021		SRR35302821	PX213605	CHHak1_Clp30_63x.mov
PseuPirLC17	Marimonada sp.	Ogden Point, Victoria, British Columbia, Canada	Ogden Point Sand	48.413892, -123.389426	marine subtidal sediment	27-05-2021		SRR35302897	PX213608	LC17_PseuPirLC17_LC17flagbean15_jun2.MP4
SC1169	Sandona sp. SC1169	No. 3 Bark Park, Richmond, British Columbia, Canada	No. 3 Bark Park (Fraser River)	49.1101852, -123.1321428	brackish sediment and macroalgae	28-05-2023		SRR35302896	PX213633	SC1166_VT_550_ZeissAxioplan_FR23233_DICclosup_on_slide.MP4, SC1166_VT_511_ZeissAxiovert_FR23233_PCclosup_on_slide.MP4
SC1200	Tremula c.f. longifila SC1200	Queen Elizabeth Park, Vancouver,British Columbia, Canada	Queen Elizabeth Park, Vancouver	49.2389827, -123.1057944	freshwater sediment and macrophytes	03-07-2023		SRR35302895	PX213632	SC1200_VT_742_ZeissAxioplan_QE23310_DICclosup_on_slide.MP4, SC1200_VT_801_ZeissAxiovert_QE23310_culture_overview_in_dish_dont_confuse_with_Bodo_prey_Telonemid-like_swimmers_are_QE23310.MTS, SC1200_VT_802_ZeissAxiovert_QE23310_PCclosup_on_slide.MTS
ThaumN4	Allas sp.	Quadra Island, British Columbia, Canada	Quadra Island	50.11583, -125.221304	marine water, shore-collected	04-06-2024		SRR35302894	PX213622	N4_C0843.MP4
ThaumPKS13	Thaumatomonada sp.	Playa Kanoa, Curacao	Playa Kanoa Sand	12.174904, -68.865602	marine intertidal sediment	24-02-2023		SRR35302893	PX213623	PKS13_C0012.MP4
ThaumPRC3	Thaumatomonada sp.	Powell River, British Columbia, Canada	Powell River Sand	49.844908, -124.533263	marine intertidal sediment	27-08-2020		SRR35302892	PX213624	PRC3_C0055.MP4
ThauxQAP6	Thaumatomastix sp.	Quadra Island, British Columbia, Canada	Quadra Annex Plankton Tow	50.115276, -125.219791	marine water column, hand plankton tow	12-09-2021		SRR35302890	PX213625	QAP6_C0570.MP4
ThauxQB8	Thaumatomastix sp.	Quadra Island, British Columbia, Canada	Quadra settlement brush (PIS-010)	50.103127, -125.211307	settlement brush, marine	19-04-2023		SRR35302889	PX213626	QB8_C0027.MP4
VentBB13	Filosa sp. (Novel Clade C)	Centennial Beach, Boundary Bay, Vancouver,British Columbia, Canada	Centennial Beach Sand	49.010033, -123.036444	marine intertidal sediment	28-07-2020		SRR35302888, SRR35302891	PX213614	BB13.MP4
VentBB15	Filosa sp. (Novel Clade C)	Centennial Beach, Boundary Bay, Vancouver,British Columbia, Canada	Centennial Beach Sand	49.010033, -123.036444	marine intertidal sediment	31-07-2020		SRR35302886	PX213615	BB15.MP4
VentFissPRC2	Ventrifissura sp.	Powell River, British Columbia, Canada	Powell River Sand	49.844908, -124.533263	marine intertidal sediment	27-08-2020		SRR35302885	PX213592	PRC2_C0054.MP4
VentFissTBS18	Ventrifissura sp.	Quadra Island, British Columbia, Canada	Quadra Tula Beach Sand	50.11583, -125.221304	marine intertidal sediment	20-04-2023		SRR35302884	PX213591	TBS18_C0035.MP4
VentKSB2	Ventrifissura sp.	Quadra Island, British Columbia, Canada	Kayak Shed Beach Sand	50.117212, -125.225671	marine intertidal sediment	14-09-2021		SRR35302882	PX227523	KSB2_C0588.MP4
VentTBM7	Filosa sp. (Novel Clade C)	Quadra Island, British Columbia, Canada	Quadra Tula Beach Mud	50.11583, -125.221304	marine intertidal sediment	15-06-2023		SRR35302881	PX213593	TBM7_C0026.MP4
VentTBS9	Ventrifissura sp.	Quadra Island, British Columbia, Canada	Quadra Tula Beach Sand	50.11583, -125.221304	marine intertidal sediment	15-09-2021		SRR35302880	PX227524	TBS9_C0608.MP4
VerrBB16	Verrucomonas bifida	Centennial Beach, Boundary Bay, Vancouver,British Columbia, Canada	Centennial Beach Sand	49.010033, -123.036444	marine intertidal sediment	31-07-2020		SRR35302883, SRR35302859	PX213600	BB16.MP4
VerruBB8	Verrucomonas bifida	Centennial Beach, Boundary Bay, Vancouver,British Columbia, Canada	Centennial Beach Sand	49.010033, -123.036444	marine intertidal sediment	22-07-2020		SRR35302858	PX213601	BB8.MP4
VerruBBco (VerrBB16, VerruBB8)	Verrucomonas bifida	–	–	–	–	–	Phylofisher-collapsed taxon (VerrBB16, VerruBB8)	–	–
VerruQB6	Verrucomonas sp.	Quadra Island, British Columbia, Canada	Quadra settlement brush (PIS-010)	50.103127, -125.211307	settlement brush, marine	18-04-2023		SRR35302857	PX213603	QB6_C0025.MP4
VerruQB7	Verrucomonas sp.	Quadra Island, British Columbia, Canada	Quadra settlement brush (PIS-010)	50.103127, -125.211307	settlement brush, marine	19-04-2023		SRR35302854	PX213602	QB7_C0026.MP4
