# Supplementary material for: Phylogenomic tree of Cercozoa based on single-cell transcriptomes from 100 uncultured cells
Source: BMC Biol. 2026 Jan 30;24:55. doi: 10.1186/s12915-026-02536-4 (PMC12930898; doi:10.1186/s12915-026-02536-4)
Supplement: Supplementary file 6 — Additional file 6. Table S2. Sequencing information for all cells [file 12915_2026_2536_MOESM6_ESM.xlsx]

## Sheet: Sheet1
ID	taxon	sequencing platform	sequencing strategy	NCBI SRA accession
AllasLQco (AllasQCH4, AllasQCH6)	Allas sp.	N/A (Phylofisher-collapsed taxon)	N/A (Phylofisher-collapsed taxon)	SRR35302899, SRR35302846, SRR35302818
AllasLRB6	Allas sp.	Illumina NextSeq 500	2 x 150 bp	SRR35302900
AllasQCH4	Allas sp.	Illumina NextSeq 500, MiqSeq	2 x 150 bp, 2 x 250bp	SRR35302899, SRR35302846
AllasQCH6	Allas sp.	Illumina NextSeq 500	2 x 150 bp	SRR35302818
AulacanDPH28	Aulographis c.f. stellata	Illumina NextSeq 500	2 x 150 bp	SRR35302807
AulacanDPH4	Aulographis sp.	Illumina NextSeq 500	2 x 150 bp	SRR35302875
Aulo-Co (AuloDPH10, AuloDPH12)	Aulastrum sp.	N/A (Phylofisher-collapsed taxon)	N/A (Phylofisher-collapsed taxon)	SRR35302794, SRR35302782
AuloDPH1	Aulosphaerid sp.	Illumina NextSeq 500	2 x 150 bp	SRR35302863
AuloDPH10	Aulastrum sp.	Illumina NextSeq 500	2 x 150 bp	SRR35302794
AuloDPH12	Aulastrum sp.	Illumina NextSeq 500	2 x 150 bp	SRR35302782
AuloDPH14	Aulosphaerid sp.	Illumina NextSeq 500	2 x 150 bp	SRR35302831
AuloDPH25	Aulosphaerid sp.	Illumina NextSeq 500	2 x 150 bp	SRR35302898
AuloLiz209	Castanarium sp.	Illumina NextSeq 500	2 x 150 bp	SRR35302887
AuloLiz39	Castanarium sp.	Illumina NextSeq 500	2 x 150 bp	SRR35302856
AuloLiz40	Castanarium sp.	Illumina NextSeq 500	2 x 150 bp	SRR35302853
AuloLiz42	Castanarium sp.	Illumina NextSeq 500	2 x 150 bp	SRR35302852
AuloscLiz303	Aulosphaerid sp.	Illumina NovaSeqX	2 x 150 bp	SRR35302855
AuloscLiz304	Aulosphaerid sp.	Illumina NovaSeqX	2 x 150 bp	SRR35302851
AuloscLiz305	Aulosphaerid sp.	Illumina NovaSeqX	2 x 150 bp	SRR35302850
AuloscLiz307	Aulosphaerid sp.	Illumina NovaSeqX	2 x 150 bp	SRR35302849
AurantQB5	Auranticordis sp.	Illumina NextSeq 500	2 x 150 bp	SRR35302848
CercABS1	Cryothecomonad sp.	Illumina NextSeq 500	2 x 150 bp	SRR35302845
CercoCBS1	Marimonada sp.	Illumina NextSeq 500	2 x 150 bp	SRR35302844
CercoCBS2	Filosa sp. (NC6)	Illumina NextSeq 500	2 x 150 bp	SRR35302847
CercoLC32-240	Marimonada sp.	Illumina NextSeq 500	2 x 150 bp	SRR35302843
CercoLC32-83	Ventricleftid sp. (eVentri-clade)	Illumina NextSeq 500	2 x 150 bp	SRR35302842
CercomSPO5	Cercomonas sp.	Illumina NextSeq 500	2 x 150 bp	SRR35302841
CercoSMB3	Filosa sp. (Novel Clade B)	Illumina NextSeq 500	2 x 150 bp	SRR35302840
CercoTBM1	Cryothecomonad sp.	Illumina NovaSeqX	2 x 150 bp	SRR35302839
CercoTBM2	Ventricleftid sp. (Novel Clade A)	Illumina NovaSeqX	2 x 150 bp	SRR35302820
CercoTBM3	Ventricleftid sp. (Novel Clade A)	Illumina NovaSeqX	2 x 150 bp	SRR35302819
CercoTBM4	Ventricleftid sp. (Novel Clade A)	Illumina NovaSeqX	2 x 150 bp	SRR35302817
CercoTBS14	Filosa sp. (NC6)	Illumina NextSeq 500	2 x 150 bp	SRR35302816
CercoTBS20	Filosa sp. (NC6)	Illumina NextSeq 500	2 x 150 bp	SRR35302815
CercoTBS21	Filosa sp. (NC6)	Illumina NextSeq 500	2 x 150 bp	SRR35302814
CercoTBS22	Marimonada sp.	Illumina NovaSeqX	2 x 150 bp	SRR35302813
CercoTS2	Filosa sp. (Novel Clade B)	Illumina NextSeq 500	2 x 150 bp	SRR35302812
CercoWF2	Skiomonad sp. (Novel Clade D)	Illumina NextSeq 500	2 x 150 bp	SRR35302811
CercoWF3	Skiomonad sp. (Novel Clade D)	Illumina NextSeq 500	2 x 150 bp	SRR35302810
CercoWF4	Skiomonad sp. (Novel Clade D)	Illumina NextSeq 500	2 x 150 bp	SRR35302809
CercoWFco (CercoWF2, CercoWF3, CercoWF4)	Skiomonad sp. (Novel Clade D)	N/A (Phylofisher-collapsed taxon)	N/A (Phylofisher-collapsed taxon)	SRR35302811, SRR35302810, SRR35302809
CercQB4	Thecofilosa sp.	Illumina NextSeq 500	2 x 150 bp	SRR35302808
CercQCH1	Ventricleftid sp. (Novel Clade A)	Illumina NextSeq 500	2 x 150 bp	SRR35302806
CercQCH3	Ventricleftid sp. (Novel Clade A)	Illumina NextSeq 500, MiqSeq	2 x 150 bp, 2 x 250bp	SRR35302805, SRR35302804
CercTBS11	Ventrifissura sp.	Illumina NextSeq 500	2 x 150 bp	SRR35302803
ChalleDPH6	Protocystis sp.	Illumina NextSeq 500	2 x 150 bp	SRR35302802
CoeloLiz306-1	Aulokleptes sp.	Illumina NovaSeqX	2 x 150 bp	SRR35302800
CoeloLiz306-2	Aulokleptes sp.	Illumina NovaSeqX	2 x 150 bp	SRR35302879
CryoHMC11	Cryothecomonas aestivalis	Illumina NextSeq 500	2 x 150 bp	SRR35302878
CryoLC27flake6	Cryothecomonas longipes	Illumina NextSeq 500	2 x 150 bp	SRR31106254
CryoNO2022	Filosa sp. (Novel Clade B)	Illumina NextSeq 500	2 x 150 bp	SRR35302877
CryoQCF12	Filosa sp. (Novel Clade)	Illumina NextSeq 500	2 x 150 bp	SRR35302876
CryoSRP1	Cryothecomonas longipes	Illumina NextSeq 500	2 x 150 bp	SRR31106255
CryoSRP2	Cryothecomonas longipes	Illumina NextSeq 500	2 x 150 bp	SRR35302874
CryoTBS8	Marimonada sp.	Illumina NextSeq 500	2 x 150 bp	SRR35302873
Cryotheco1-co (CryoHMC11, LC28ditswarm12, LC28ditblobs10)	Cryothecomonas aestivalis	N/A (Phylofisher-collapsed taxon)	N/A (Phylofisher-collapsed taxon)	SRR35302878, SRR35302795, SRR35302793
Cryotheco2-co (CryoLC27flake6, CryoSRP1, CryoSRP2)	Cryothecomonas longipes	N/A (Phylofisher-collapsed taxon)	N/A (Phylofisher-collapsed taxon)	SRR31106254, SRR31106255, SRR35302874
DiscoTBS24	Discomonas sp.	Illumina NovaSeqX	2 x 150 bp	SRR35302872
EbriaHDP7	Ebria tripartita	Illumina MiSeq	2 x 250 bp	SRR35302871
EbriaLC27P7	Ebria tripartita	Illumina NextSeq 500	2 x 150 bp	SRR35302870
EbriaLCE2	Cryothecomonas longipes	Illumina MiSeq	2 x 250 bp	SRR35302869
EbriaQAP-HDPco (EbriaQAP11, EbriaQAP17, EbriaQAP18)	Ebria tripartita	N/A (Phylofisher-collapsed taxon)	N/A (Phylofisher-collapsed taxon)	SRR35302867, SRR35302866, SRR35302864
EbriaQAP9	Ebria tripartita	Illumina NextSeq 500	2 x 150 bp	SRR35302868
EbriaQAP11	Ebria tripartita	Illumina NextSeq 500	2 x 150 bp	SRR35302867
EbriaQAP17	Ebria tripartita	Illumina NextSeq 500	2 x 150 bp	SRR35302866
EbriaQAP18	Ebria tripartita	Illumina NextSeq 500	2 x 150 bp	SRR35302864
FiloLC-co (FiloLC32-4, FiloLC32-5, FiloLC32-77, LC35avo1044, LC34avo877)	Cryothecomonad sp.	N/A (Phylofisher-collapsed taxon)	N/A (Phylofisher-collapsed taxon)	SRR35302862, SRR35302865, SRR35302861, SRR35302792, SRR35302791
FiloLC32-4	Cryothecomonad sp.	Illumina NextSeq 500	2 x 150 bp	SRR35302862
FiloLC32-5	Cryothecomonad sp.	Illumina NextSeq 500	2 x 150 bp	SRR35302865
FiloLC32-77	Cryothecomonad sp.	Illumina NextSeq 500	2 x 150 bp	SRR35302861
FiloLC33-100	Cryothecomonad sp.	Illumina NextSeq 500	2 x 150 bp	SRR35302860
FiloLC33-101	Cryothecomonad sp.	Illumina NextSeq 500	2 x 150 bp	SRR35302801
FiloLC33-103	Cryothecomonad sp.	Illumina NextSeq 500	2 x 150 bp	SRR35302799
FiloLC33-99	Cryothecomonad sp.	Illumina NextSeq 500	2 x 150 bp	SRR35302798
FilosaNC4-co (VentBB13, VentBB15, VentTBM7)	Filosa sp. (Novel Clade C)	N/A (Phylofisher-collapsed taxon)	N/A (Phylofisher-collapsed taxon)	SRR35302888, SRR35302891, SRR35302886, SRR35302881
FilosaNC6-co (CercoTBS14, CercoTBS20, CercoTBS21)	Filosa sp. (NC6)	N/A (Phylofisher-collapsed taxon)	N/A (Phylofisher-collapsed taxon)	SRR35302816, SRR35302815, SRR35302814
Hedrpel	Hedriocystis pellucida strain UP2314 (cell SC1203)	Illumina NovaSeqX	2 x 150 bp	SRR35302797
LC26E1	Ebria sp. LC26-ebrid1	Illumina NextSeq 500	2 x 150 bp	SRR35302796
LC28ditblobs10	Cryothecomonas aestivalis	Illumina NextSeq 500	2 x 150 bp	SRR35302795
LC28ditswarm12	Cryothecomonas aestivalis	Illumina NextSeq 500	2 x 150 bp	SRR35302793
LC35avo1044	Cryothecomonad sp.	Illumina NovaSeqX	2 x 150 bp	SRR35302792
LC35avo877	Cryothecomonad sp.	Illumina NovaSeqX	2 x 150 bp	SRR35302791
LC35flag517	Ebria sp.	Illumina NovaSeqX	2 x 150 bp	SRR35302790
LC35flag928	Cryothecomonas sp.	Illumina NovaSeqX	2 x 150 bp	SRR35302789
LC35paras1022	Cryothecomonas sp.	Illumina NovaSeqX	2 x 150 bp	SRR35302788
LC35stumpy960	Cryothecomonad sp.	Illumina NovaSeqX	2 x 150 bp	SRR35302787
LirellaLiz294	Lirella bullata	Illumina NovaSeqX	2 x 150 bp	SRR35302786
Liz302	Aulosphaerid sp.	Illumina NextSeq 500	2 x 150 bp	SRR35302784
MariSB456C (MariSB4C, MariSB5C, MariSB6C)	Marimonada sp.	N/A (Phylofisher-collapsed taxon)	N/A (Phylofisher-collapsed taxon)	SRR35302781, SRR35302780, SRR35302783
MariSB4C	Marimonada sp.	MiSeq	2 x 250 bp	SRR35302781
MariSB5C	Marimonada sp.	MiSeq	2 x 250 bp	SRR35302780
MariSB6C	Marimonada sp.	MiSeq	2 x 250 bp	SRR35302783
PhaeoDPH31	Protocystis acornis	Illumina NovaSeqX	2 x 150 bp	SRR35302838
ProtaPRC1	Protaspa sp.	Illumina NextSeq 500	2 x 150 bp	SRR35302837
ProtocyDPH19	Protocystis acornis	Illumina NextSeq 500	2 x 150 bp	SRR35302836
ProtocyDPH23	Protocystis c.f. acornis	Illumina NextSeq 500	2 x 150 bp	SRR35302835
ProtocysDPH32	Protocystis acornis	Illumina NovaSeqX	2 x 150 bp	SRR35302834
ProtocysDPH33	Protocystis acornis	Illumina NovaSeqX	2 x 150 bp	SRR35302833
ProtocysDPH34	Protocystis acornis	Illumina NovaSeqX	2 x 150 bp	SRR35302832
ProtocysLC32-28	Protocystis sp.	Illumina NextSeq 500	2 x 150 bp	SRR35302830
ProtocysLiz123	Protocystis triangularis	Illumina NovaSeqX	2 x 150 bp	SRR35302829
ProtocysLiz134	Protocystis c.f. acornis	Illumina NovaSeqX	2 x 150 bp	SRR35302828
ProtocysLiz140	Protocystis acornis	Illumina NovaSeqX	2 x 150 bp	SRR35302827
ProtocysLiz282	Protocystis sp.	Illumina NovaSeqX	2 x 150 bp	SRR35302785
ProtocysLiz29	Protocystis sp.	Illumina NovaSeqX	2 x 150 bp	SRR35302826
ProtocysLiz31	Protocystis sp.	Illumina NovaSeqX	2 x 150 bp	SRR35302825
ProtocysLiz52	Protocystis acornis	Illumina NovaSeqX	2 x 150 bp	SRR35302824
Protocystis1-co (ProtocysLC32-28, ProtocysLiz29, ProtocysLiz31)	Protocystis sp.	N/A (Phylofisher-collapsed taxon)	N/A (Phylofisher-collapsed taxon)	SRR35302830, SRR35302826, SRR35302825
Protocystis2-co (ProtocyDPH19, PhaeoDPH31, ProtocysDPH33)	Protocystis acornis	N/A (Phylofisher-collapsed taxon)	N/A (Phylofisher-collapsed taxon)	SRR35302836, SRR35302838, SRR35302833
Protocystis3-co (ProtocysDPH32, ProtocysDPH34, ProtocysLiz52, ProtocysLiz140)	Protocystis acornis	N/A (Phylofisher-collapsed taxon)	N/A (Phylofisher-collapsed taxon)	SRR35302834, SRR35302832, SRR35302824, SRR35302827
ProtSMB2	Rhizaria sp.	Illumina NextSeq 500	2 x 150 bp	SRR35302823
ProtTBS5	Protaspa sp.	Illumina NextSeq 500	2 x 150 bp	SRR35302822
PseuPirCHHak1	Marimonada sp.	Illumina NextSeq 500	2 x 150 bp	SRR35302821
PseuPirLC17	Marimonada sp.	Illumina NextSeq 500	2 x 150 bp	SRR35302897
SC1166	Sandona sp. SC1169	Illumina NovaSeqX	2 x 150 bp	SRR35302896
SC1200	Tremula c.f. longifila SC1200	Illumina NovaSeqX	2 x 150 bp	SRR35302895
ThaumN4	Allas sp.	Illumina NovaSeqX	2 x 150 bp	SRR35302894
ThaumPKS13	Thaumatomonada sp.	Illumina NextSeq 500	2 x 150 bp	SRR35302893
ThaumPRC3	Thaumatomonada sp.	Illumina NextSeq 500	2 x 150 bp	SRR35302892
ThauxQAP6	Thaumatomastix sp.	Illumina NextSeq 500	2 x 150 bp	SRR35302890
ThauxQB8	Thaumatomastix sp.	Illumina NextSeq 500	2 x 150 bp	SRR35302889
VentBB13	Filosa sp. (Novel Clade C)	Illumina NextSeq 500, MiqSeq	2 x 150 bp, 2 x 250bp	SRR35302888, SRR35302891
VentBB15	Filosa sp. (Novel Clade C)	Illumina NextSeq 500	2 x 150 bp	SRR35302886
VentFissPRC2	Ventrifissura sp.	Illumina NextSeq 500	2 x 150 bp	SRR35302885
VentFissTBS18	Ventrifissura sp.	Illumina NextSeq 500	2 x 150 bp	SRR35302884
VentKSB2	Ventrifissura sp.	Illumina NextSeq 500	2 x 150 bp	SRR35302882
VentTBM7	Filosa sp. (Novel Clade C)	Illumina NovaSeqX	2 x 150 bp	SRR35302881
VentTBS9	Ventrifissura sp.	Illumina NextSeq 500	2 x 150 bp	SRR35302880
VerrBB16	Verrucomonas bifida	Illumina NextSeq 500, MiqSeq	2 x 150 bp, 2 x 250bp	SRR35302883, SRR35302859
VerruBB8	Verrucomonas bifida	Illumina NextSeq 500	2 x 150 bp	SRR35302858
VerruBBco (VerrBB16, VerruBB8)	Verrucomonas bifida	N/A (Phylofisher-collapsed taxon)	N/A (Phylofisher-collapsed taxon)	SRR35302858, SRR35302883, SRR35302859
VerruQB6	Verrucomonas sp.	Illumina NextSeq 500	2 x 150 bp	SRR35302857
VerruQB7	Verrucomonas sp.	Illumina NextSeq 500	2 x 150 bp	SRR35302854
