# Supplementary material for: Phylogenomic tree of Cercozoa based on single-cell transcriptomes from 100 uncultured cells
Source: BMC Biol. 2026 Jan 30;24:55. doi: 10.1186/s12915-026-02536-4 (PMC12930898; doi:10.1186/s12915-026-02536-4)
Supplement: Supplementary file 7 — Additional file 7. Table S3. Metrics for multigene analysis [file 12915_2026_2536_MOESM7_ESM.xlsx]

## Sheet: main 70-gene dataset
PhyloFisher ID	Taxon	% site completeness (70-gene dataset)	source	Phylofisher co-assembly and samples used in co-assembly
Abolprol	Abollifer prolabens	57.6136	SRR7816691
AllasLQco	Allas sp.	69.2929	SRR35302899, SRR35302846, SRR35302818	AllasLQco (AllasQCH4, AllasQCH6)
AllasLRB6	Allas sp.	40.3474	SRR35302900
Ammo1384	Ammonia sp.	86.1594	https://figshare.com/articles/Marine_Microbial_Eukaryotic_Transcriptome_Sequencing_Project_re-assemblies/3840153/3
AmorphAmoe	Amorphochlora amoebiformis	91.738	EP00464
AstroSerr	Astrolonche serrata	49.7676	EP00494
AulacanDPH28	Aulographis c.f. stellata	52.1736	SRR35302807
AulacanDPH4	Aulographis sp.	34.4589	SRR35302875
AulacanScoly	Aulacantha scolymantha	17.8941	EP00463
Aulo-Co	Aulastrum sp.	84.4874	SRR35302794, SRR35302782	Aulo-Co (AuloDPH10, AuloDPH12)
AuloDPH1	Aulosphaerid sp.	62.1646	SRR35302863
AuloLiz209	Castanarium sp.	40.5677	SRR35302887
AuloLiz39	Castanarium sp.	34.2305	SRR35302856
AuloLiz40	Castanarium sp.	44.9882	SRR35302853
AuloLiz42	Castanarium sp.	89.642	SRR35302852
AuloscLiz304	Aulosphaerid sp.	85.0746	SRR35302851
AuloscLiz305	Aulosphaerid sp.	42.99	SRR35302850
AuloscLiz307	Aulosphaerid sp.	82.2608	SRR35302849
AurantQB5	Auranticordis sp.	63.0046	SRR35302848
Aurisoli	Aurigamonas solis	95.0249	SRR7816690
Bigenata	Bigelowiella natans	95.2288	GCF_000002455.1
BonaOstr	Bonamia ostreae	39.0262	PRJNA1051017, (Thoren et al 2024)
Brevmoto	Brevimastigomonas motovehiculus	95.922	SRR4017993
CercoCBS1	Marimonada sp.	29.3206	SRR35302844
CercoCBS2	Filosa sp. (NC6)	63.8692	SRR35302847
CercoClav	Cercomonas clavideferens	32.1344	SRR1598950
CercoLC32-240	Marimonada sp.	95.9139	SRR35302843
CercoLC32-83	Ventricleftid sp. (eVentri-clade)	65.4433	SRR35302842
CercomSPO5	Cercomonas sp.	58.7146	SRR35302841
CercoSMB3	Filosa sp. (Novel Clade)	63.6571	SRR35302840
CercoTBM2	Ventricleftid sp. (Novel Clade)	23.1303	SRR35302820
CercoTBM3	Ventricleftid sp. (Novel Clade)	40.1517	SRR35302819
CercoTBS22	Marimonada sp.	71.0464	SRR35302813
CercoTS2	Filosa sp. (Novel Clade)	37.0198	SRR35302812
CercoWFco	Skiomonad sp. (WF2, WF3, WF4)	68.7301	SRR35302811, SRR35302810, SRR35302809	CercoWFco (CercoWF2, CercoWF3, CercoWF4)
CercQCH3	Ventricleftid sp. (Novel Clade)	74.4474	SRR35302805, SRR35302804
ChalleDPH6	Protocystis sp.	72.1556	SRR35302802
Chlorept	Chlorarachnion reptans	95.4245	https://de.cyverse.org/anon-files//iplant/home/shared/imicrobe/projects/104/samples/1723/MMETSP0109_clean.pep.fa
CoeloLiz306-2	Aulokleptes sp.	25.104	SRR35302879
coll2017	Collozoum sp. DDM2005	71.5358	ERS1825683
CryoNO2022	Filosa sp. (Novel Clade)	44.0095	SRR35302877
CryoQCF12	Filosa sp. (Novel Clade)	41.6442	SRR35302876
CryoTBS8	Marimonada sp.	53.454	SRR35302873
Cryotheco1-co	Cryothecomonas aestivalis	93.6547	SRR35302878, SRR35302795, SRR35302793	Cryotheco1-co (CryoHMC11, LC28ditswarm12, LC28ditblobs10)
Cryotheco2-co	Cryothecomonas longipes	94.9923	SRR31106254, SRR31106255, SRR35302874	Cryotheco2-co (CryoLC27flake6, CryoSRP1, CryoSRP2)
Cyphoderia	Cyphoderia sp.	87.709	SRR11962124
DeepSAG-R1-2-rhiCoA	Thecofilosa sp.	40.5269	https://figshare.com/articles/dataset/Single_Cell_Genomic_Assemblies/7352966, (Wideman et al 2020)
DeepSAG-R1-B2	Thecofilosa sp.	38.0067	https://figshare.com/articles/dataset/Single_Cell_Genomic_Assemblies/7352966, (Wideman et al 2020)
DeepSAG-R1-E2	Thecofilosa sp.	21.703	https://figshare.com/articles/dataset/Single_Cell_Genomic_Assemblies/7352966, (Wideman et al 2020)
DiscoTBS24	Discomonas sp.	27.3632	SRR35302872
EbriaHDP7	Ebria tripartita	72.6287	SRR35302871				LC28ditblobs10
EbriaLC27P7	Ebria tripartita	89.0384	SRR35302870				LC28ditswarm12
EbriaLCE2	Ebria tripartita	67.1968	SRR35302869
EbriaQAP-HDPco	Ebria tripartita	92.8065	SRR35302867, SRR35302866, SRR35302864	EbriaQAP-HDPco (EbriaQAP11, EbriaQAP17, EbriaQAP18)
ElphMarg	Elphidium margaritaceum	87.6519	EP00485
Euglrotu	Euglypha rotunda	38.5124	SRR2006120
EuglyphaSp1	Euglypha sp.	46.0484	SRR11962120
EuglyphaSp3	Euglypha sp.	96.9089	SRR11962122
FiloLC-co	Cryothecomonad sp.	98.1649	SRR35302862, SRR35302865, SRR35302861, SRR35302792, SRR35302791	FiloLC-co (FiloLC32-4, FiloLC32-5, FiloLC32-77, LC35avo1044, LC34avo877)
FilosaNC4-co	Filosa sp. (Novel Clade)	89.8214	SRR35302888, SRR35302891, SRR35302886, SRR35302881	FilosaNC4-co (VentBB13, VentBB15, VentTBM7)
FilosaNC6-co	Filosa sp. (NC6)	63.91	SRR35302816, SRR35302815, SRR35302814	FilosaNC6-co (CercoTBS14, CercoTBS20, CercoTBS21)
FiloTene	Filoreta tenera	70.0269	PRJNA222694
FiscTerr	Fisculla terrestris	97.4798	PRJNA1262159
GlobTurgAur	Globobulimina turgida-auriculata	94.7231	EP00482
Gromspha	Gromia sphaerica	34.7769	SRR2003399
Guttvulg	Guttulinopsis vulgaris	89.7888	NA/ (Illumina data) (=comment in PhyloFisher DB)
Hedrpel	Hedriocystis pellucida strain UP2314 (cell SC1203)	93.6873	SRR35302797
HelkeMari	Helkesimastix marina	47.753	SRR1598951
KataPolo	Katarium polorum	95.6447	PRJNA1262159
Lapoguse	Lapot gusevi	93.826	SRR7816692
LC35flag517	Ebria sp.	95.5713	SRR35302790
LC35flag928	Cryothecomonas sp.	62.8171	SRR35302789
LC35paras1022	Cryothecomonas sp.	62.1564	SRR35302788
LC35stumpy960	Cryothecomonad sp.	58.3395	SRR35302787
Leptvora	Leptophrys vorax	89.96	SRR2003407
LirellaLiz294	Lirella bullata	16.0672	SRR35302786
LothareGlob	Lotharella globosa	97.3249	EP00469
MariSB456C	Marimonada sp.	88.4593	SRR35302781, SRR35302780, SRR35302783	MariSB456C (MariSB4C, MariSB5C, MariSB6C)
MatazaD1	Mataza sp.	95.5713	https://de.cyverse.org/anon-files//iplant/home/shared/imicrobe/projects/104/samples/1696/MMETSP0086_clean.pep.fa & https://de.cyverse.org/anon-files//iplant/home/shared/imicrobe/projects/104/samples/1715/MMETSP0087_clean.pep.fa
MicroNuta	Micrometopion nutans	27.7465	SRR1793240
NorrisSphae	Norrisiella sphaerica	85.9147	EP00471
NudiProd	Nudifila producta	45.5917	SRR1598962
OrciAgil	Orciraptor agilis	84.9686	PRJEB49867
ParacercMari	Paracercomonas marina	19.1665	EP00460
PartenGlos	Partenskyella glossopodia	91.5586	EP00472
Paulchro	Paulinella chromatophora	98.7277	SRR3221671
Plasbras	Plasmodiophora brassicae	97.9121	ftp://ftp.ensemblgenomes.org/pub/protists/release-41/fasta/protists_rhizaria1_collection/plasmodiophora_brassicae/pep/
PolymBeta	Polymyxa betae A26-41	48.2832	GCA_003693705
ProtocyDPH23	Protocystis c.f. acornis	95.6774	SRR35302835
ProtocysLiz123	Protocystis triangularis	26.7678	SRR35302829
ProtocysLiz134	Protocystis c.f. acornis	51.309	SRR35302828
Protocystis1-co	Protocystis sp.	90.1558	SRR35302830, SRR35302826, SRR35302825	Protocystis1-co (ProtocysLC32-28, ProtocysLiz29, ProtocysLiz31)
Protocystis2-co	Protocystis acornis	99.0294	SRR35302836, SRR35302838, SRR35302833	Protocystis2-co (ProtocyDPH19, PhaeoDPH31, ProtocysDPH33)
Protocystis3-co	Protocystis acornis	99.3965	SRR35302834, SRR35302832, SRR35302824, SRR35302827	Protocystis3-co (ProtocysDPH32, ProtocysDPH34, ProtocysLiz52, ProtocysLiz140)
ProtTBS5	Protaspa sp.	42.9737	SRR35302822
PseuPirCHHak1	Marimonada sp.	83.6392	SRR35302821
PseuPirLC17	Marimonada sp.	58.7228	SRR35302897
RhogoB42H2	Rhogostoma sp. B42H2	99.3557	PRJNA1262159
RhogoFlor	Rhogostoma florae	98.5156	PRJNA1262159
RhogoKyo	Rhogostoma kyoshii	99.266	PRJNA1262159
RhogoSch733	Rhogostoma schuessleri 733	89.8214	PRJNA1262159
Rosalina	Rosalina sp.	41.7992	EP00486
SC1166	Sandona sp. strain SC1169	67.4007	SRR35302896
SC1200	c.f. Tremula longifila SC1200	84.8381	SRR35302895
Sori0191	Sorites sp.	85.3193	SRR1296734
SpongSubt	Spongospora subterranea	64.5951	EP00474
ThaumPKS13	Thaumatomonada sp.	54.7345	SRR35302893
ThaumPRC3	Thaumatomonada sp.	37.7131	SRR35302892
ThauxQAP6	Thaumatomastix sp.	44.768	SRR35302890
ThauxQB8	Thaumatomastix sp.	75.7361	SRR35302889
VentFissPRC2	Ventrifissura sp.	38.8467	SRR35302885
VentFissTBS18	Ventrifissura sp.	65.6064	SRR35302884
VerruBBco	Verrucomonas bifida	80.0669	SRR35302858, SRR35302883, SRR35302859	VerruBBco (VerrBB16, VerruBB8)
VerruQB6	Verrucomonas sp.	53.1767	SRR35302857
VerruQB7	Verrucomonas sp.	38.6265	SRR35302854

## Sheet: 33-gene dataset
PhyloFisher ID	% site completeness (33-gene dataset)
Abolprol	82.5438
AllasLQco	99.355
AllasLRB6	74.5616
Ammo1384	84.5193
AmorphAmoe	89.9617
AstroSerr	40.7579
AulacanDPH28	56.4604
AulacanDPH4	37.4521
AulacanScoly	6.91393
Aulo-Co	91.1107
AuloDPH1	76.7587
AuloLiz209	54.485
AuloLiz39	31.929
AuloLiz40	73.211
AuloLiz42	97.5207
AuloscLiz303	9.77625
AuloscLiz304	99.3348
AuloscLiz305	59.7662
AuloscLiz307	95.122
AurantQB5	90.8285
Aurisoli	95.3437
Bigenata	98.5084
BonaOstr	53.1546
Brevmoto	94.9204
CercABS1	22.3947
CercoCBS1	47.6114
CercoCBS2	97.8432
CercoClav	53.7593
CercoLC32-240	99.6372
CercoLC32-83	95.5049
CercomSPO5	85.2046
CercoSMB3	90.9897
CercoTBM2	46.5027
CercoTBM3	78.976
CercoTBM4	13.8883
CercoTBS22	87.6235
CercoTS2	64.3419
CercoWFco	89.8408
CercQCH1	20.0564
CercQCH3	99.4154
CercTBS11	28.2604
ChalleDPH6	86.8575
Chlorept	95.2631
CoeloLiz306-2	26.023
coll2017	59.7662
CryoNO2022	74.5213
CryoQCF12	50.9776
CryoTBS8	93.59
Cryotheco1-co	99.6976
Cryotheco2-co	99.0929
Cyphoderia	98.0044
DeepSAG-R1-2-rhiCoA	35.6178
DeepSAG-R1-B2	32.5741
DeepSAG-R1-E2	14.8962
DiscoTBS24	50.6954
EbriaHDP7	84.4991
EbriaLC27P7	95.8678
EbriaLCE2	90.7075
EbriaQAP-HDPco	94.1141
EbriaQAP9	9.39327
ElphMarg	82.8462
Euglrotu	34.2068
EuglyphaSp1	73.5537
EuglyphaSp3	96.029
FiloLC-co	99.617
FiloLC33-101	22.1931
FilosaNC4-co	95.384
FilosaNC6-co	97.1578
FiloTene	68.2121
FiscTerr	98.327
GlobTurgAur	94.1342
Gromspha	56.924
Guttvulg	96.7144
Hedrpel	96.2911
HelkeMari	79.3792
KataPolo	94.4366
Lapoguse	92.441
LC35flag517	98.8309
LC35flag928	96.5531
LC35paras1022	97.3392
LC35stumpy960	90.5261
Leptvora	87.8855
LirellaLiz294	15.763
LothareGlob	97.561
MariSB456C	96.6741
MatazaD1	96.8353
MicroNuta	54.9284
NorrisSphae	81.3546
NudiProd	64.4023
OrciAgil	77.9682
ParacercMari	20.6208
PartenGlos	90.7881
Paulchro	99.2542
Plasbras	98.9921
PolymBeta	62.7898
ProtaPRC1	17.2546
ProtocyDPH23	98.6696
ProtocysLiz123	47.2889
ProtocysLiz134	80.8103
Protocystis1-co	99.5767
Protocystis2-co	99.5767
Protocystis3-co	99.5767
ProtSMB2	15.763
ProtTBS5	79.5404
PseuPirCHHak1	92.2395
PseuPirLC17	92.2999
RhogoB42H2	99.4154
RhogoFlor	99.1736
RhogoKyo	99.1937
RhogoSch733	90.385
Rosalina	29.3288
SandoUbi	9.15138
SC1166	78.6535
SC1200	96.8958
Sori0191	83.6928
SpongSubt	55.8557
ThaumaOxo	23.2816
ThaumPKS13	86.6156
ThaumPRC3	59.8468
ThauxQAP6	76.3959
ThauxQB8	93.6908
VentFissPRC2	66.156
VentFissTBS18	87.9661
VentKSB2	13.0014
VentTBS9	19.6735
VerruBBco	98.9115
VerruQB6	86.797
VerruQB7	68.7966
